# Supplementary material for: Macropolyhedral boron-containing cluster chemistry. The reaction of B16H20and B14H18with [PtMe2(PMe2Ph)2] to give [(PMe2Ph)2PtB16H17Me] and [(PMe2Ph)2PtB14H16]
Source: Royal Society of Chemistry journal article supplement (doi:10.1039/b419241a), 2005-01-01

**Supplementary data. Calculated coordinates for 1a and 5a and pictures of 160 MHz  $^{11}\text{B}$  and  $^{11}\text{B}\{-^1\text{H}\}$  NMR spectra for species 1a, 3 and 5.**

**Calculated coordinates [ DFT; B3LYP / 6-31G\* ] for the  $[\text{B}_{16}\text{H}_{19}]^-$  monoanion 1a**

B,0,1.2334640778,-0.7724246898,1.2691607424  
H,0,1.2139084951,-1.4512399459,2.2504908336  
B,0,0.2933431831,0.7347591134,1.1833411711  
B,0,2.0443693619,0.825346687,1.1150972956  
B,0,2.8339617284,-0.6346731439,0.4300122036  
B,0,-0.1348270145,-0.7097411758,0.2055482951  
B,0,1.4883592456,-1.5736013239,-0.286392005  
H,0,-0.2840765037,1.1241816249,2.1546821021  
H,0,2.6151463922,1.431491017,1.9712545633  
H,0,3.8066532223,-1.0876679723,0.9501392201  
B,0,-0.4030421983,0.8858997992,-0.4092127353  
B,0,1.0843167606,1.8027138903,-0.0091861293  
B,0,2.8113735104,0.9153457747,-0.4570920002  
B,0,2.6777229298,-0.6747330681,-1.2750849861  
H,0,1.4576217313,-1.0858581099,-1.5303656357  
H,0,1.4611673985,-2.7566960028,-0.4272186658  
B,0,-1.1676048285,-0.5071081381,-1.1785387806  
B,0,-1.7480318639,-1.4605625322,0.2710114502  
H,0,0.5762185231,1.4544370696,-1.147809989  
H,0,1.106024427,2.9940746684,0.0063923333  
H,0,3.7585497655,1.6038561393,-0.6773481855  
H,0,2.3647922817,0.5559460386,-1.6582856903  
H,0,3.4349621128,-1.1293748267,-2.0726688956  
H,0,-0.8418689359,-1.0554943644,-2.1907415839  
B,0,-2.8817420019,-0.4399136045,-0.7382254424  
B,0,-1.9587446846,1.1018732914,-1.0816776989  
B,0,-3.1065843761,-0.4472841571,0.9828911562  
H,0,-1.9299174627,-0.9582223554,1.4533714785  
H,0,-1.8891564432,-2.6454867152,0.3214152143  
H,0,-3.705795889,-0.9139390005,-1.4637176365  
H,0,-2.1402857251,1.7203191798,-2.0946341565  
B,0,-3.1135501911,1.0669268193,0.1414487239  
H,0,-2.7187873994,0.7412984326,1.4020253515  
H,0,-3.9838951677,-0.8836966926,1.6615071982  
H,0,-4.0651790161,1.7779541071,0.2760058418

**Calculated coordinates [DFT; B3LYP / 6-31G\* / LANL2DZ ] for [(PH<sub>3</sub>)<sub>2</sub>PtB<sub>14</sub>H<sub>16</sub>] (species 5a)**

H,0,-2.5795015563,2.802980021,-2.5658468398  
B,0,-2.5795645839,2.8029790123,-1.1668702811  
B,0,-1.2889537511,2.8029969513,-2.4148813385  
B,0,-0.5086340088,1.1644436918,-2.2145949894  
B,0,-1.0045128409,2.1758127255,-0.8122423701  
H,0,-3.1339297469,3.807238663,-0.8650850917  
B,0,-2.4892481166,1.3591644361,-0.2270247962  
H,0,-3.3595130373,1.6947298429,-1.1743044492  
H,0,-1.1312989009,1.836087136,-3.240689844  
H,0,-0.8167627384,3.7941214975,-2.8627235866  
B,0,-1.2302559361,-0.4615229203,-2.3964961064  
B,0,0.3035411255,-0.0170935132,-3.2212201195  
B,0,-1.3438479793,0.3390419275,-0.8385634406  
B,0,1.3836260843,0.9860659261,-2.2560569248  
H,0,-0.2280568447,2.716067574,-0.0898250096  
H,0,-3.0191333549,1.4530569569,0.8370229442  
Pt,0,0.2664711036,-0.387768912,0.7548561538  
B,0,0.11196440456,-1.6123712192,-2.4649872256  
H,0,-2.2332201338,-0.6399701201,-3.0159772114  
B,0,-0.7994783388,-1.398386351,-0.955736196  
B,0,1.6902619293,-0.7699336781,-2.4020260493  
H,0,0.3198315604,0.2064336497,-4.3910513635  
B,0,1.922128391,-0.0261848806,-0.8288219207  
H,0,1.4253318984,1.1957073142,-0.9664891377  
H,0,2.0575286237,1.8420533902,-2.7345221561  
P,0,2.0624419688,-0.0651988632,2.2711392996  
P,0,-1.5067446997,-0.5299303205,2.3462499885  
H,0,-0.0158667378,-2.6132876341,-3.0959813459  
H,0,-1.5211079793,-2.2553343804,-0.5437156756  
B,0,1.0460100993,-1.5981082551,-0.9780784721  
H,0,2.6294955751,-1.1797697857,-3.0075079315  
H,0,3.0142439125,0.1208996122,-0.3682163777  
H,0,3.1448572782,-0.9540238455,2.1184465314  
H,0,2.7559712735,1.1583560333,2.1809066869  
H,0,-1.2782741716,-1.3697050498,3.4610689343  
H,0,-2.7147017709,-1.0807689394,1.8830171848  
H,0,-2.0051929846,0.5975094798,3.0327271229  
H,0,1.5809616148,-2.5631805351,-0.5213712493  
H,0,1.922952504,-0.1308072507,3.6784996985

160 MHz  $^{11}\text{B}$  (upper trace) and  $^{11}\text{B}\{-^1\text{H}\}$  (lower trace) spectra for  $[(\text{PMe}_2\text{Ph})_2\text{PtB}_{14}\text{H}_{16}]$  (compound 5)

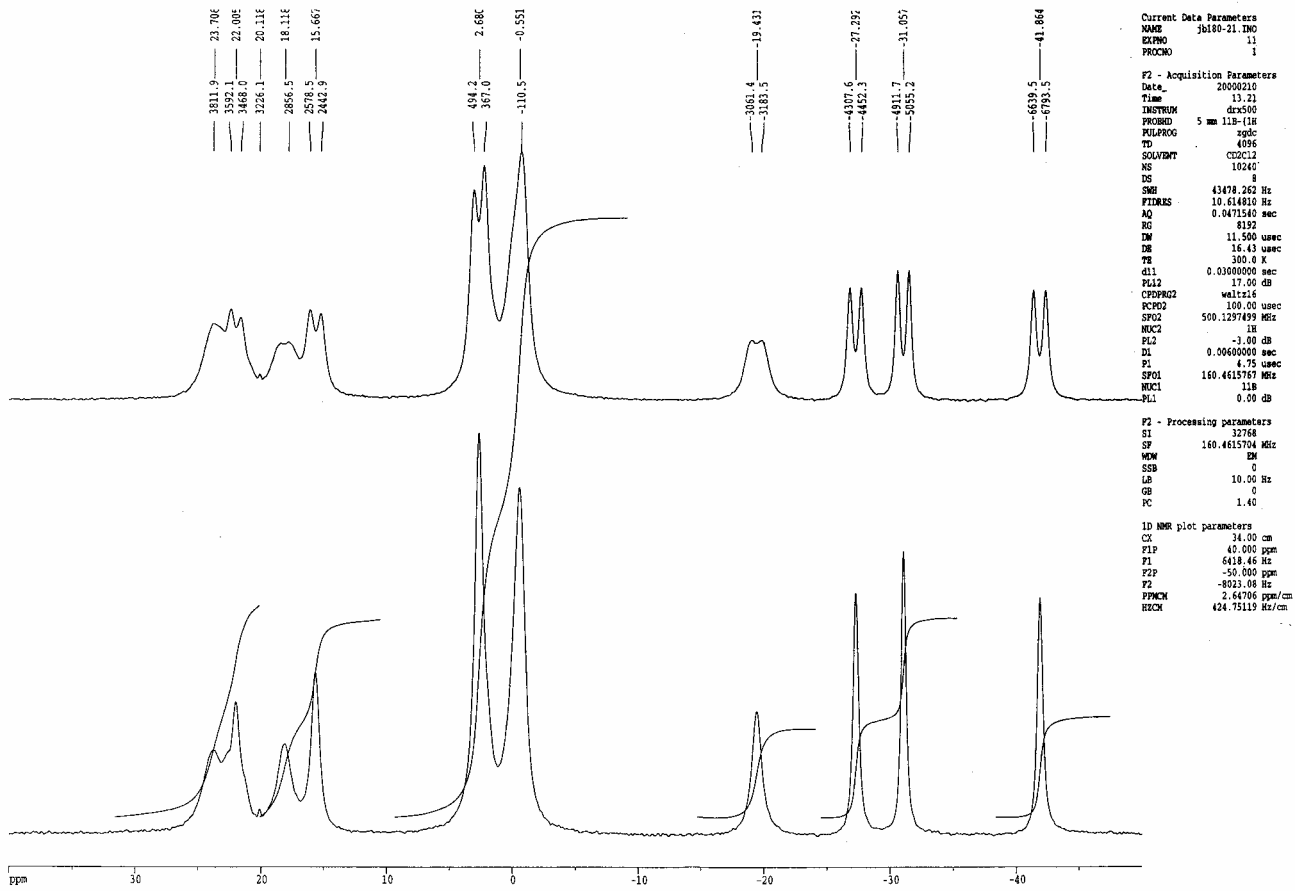

160 MHz <sup>11</sup>B (upper trace) and <sup>11</sup>B-{<sup>1</sup>H} (lower trace) spectra for [(PMe<sub>2</sub>Ph)<sub>2</sub>PtB<sub>16</sub>H<sub>17</sub>Me] (compound 3)  
(line narrowed)

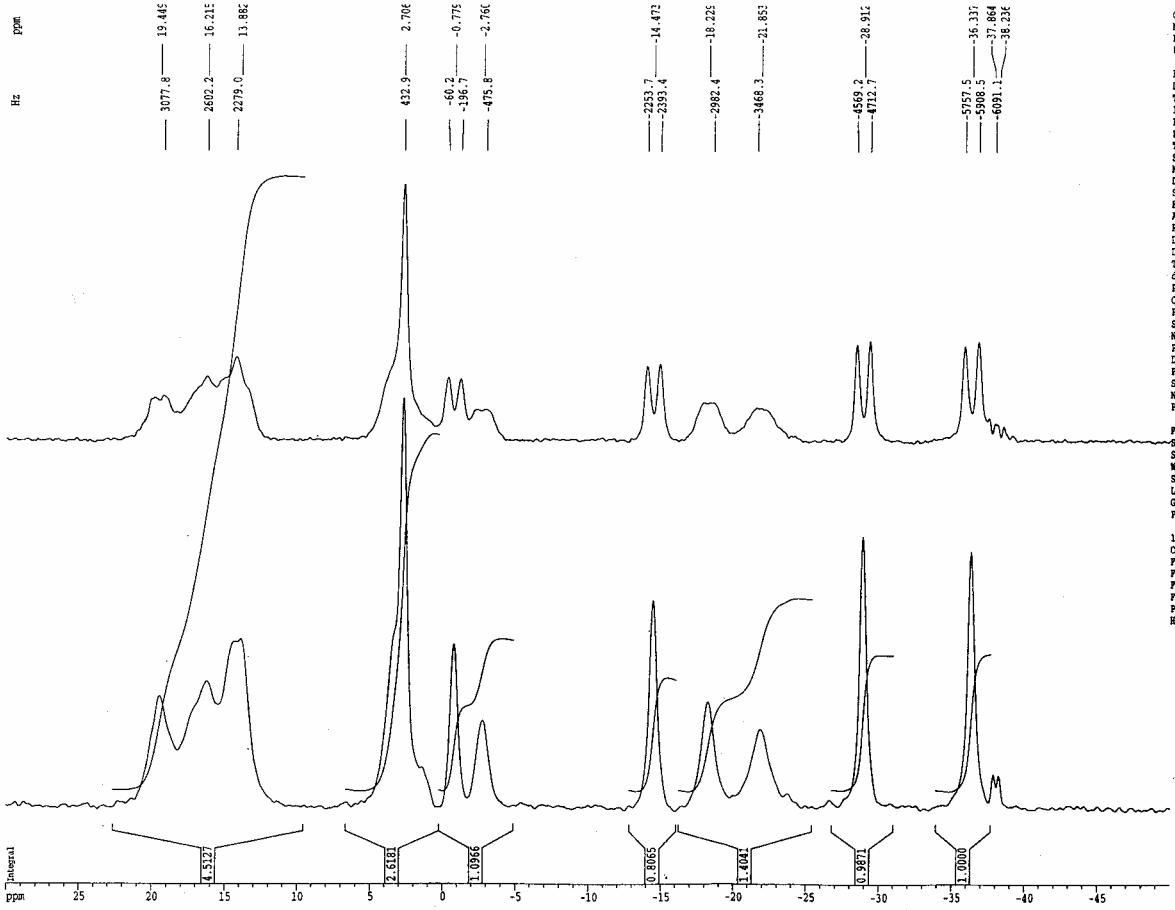

Current Data Parameters  
 NAME Job181-22.180  
 EXPNO 11  
 PROCNO 1

F2 - Acquisition Parameters  
 Date\_ 9/11/11  
 Time 11.02  
 INSTRUM drx500  
 PROBHD 5 mm QNP 1H  
 PULPROG zgpg  
 TD 4096  
 SOLVENT CDCl3  
 NS 32768  
 DS 8  
 SSB 43478.262 Hz  
 P1DRMS 10.614810 Hz  
 AQ 0.0471540 sec  
 RG 574.7  
 DM 11.500 usec  
 DE 16.43 usec  
 TS 300.0 K  
 d11 0.03000000 sec  
 PL12 21.00 dB  
 CPOPRG2 waltz16  
 PCP22 100.00 usec  
 SFO2 500.1297499 MHz  
 NUC2 1H  
 PL2 0.00 dB  
 IH 0.0000000 sec  
 P1 9.00 usec  
 SFO1 160.4615767 MHz  
 NUC1 11B  
 PL1 0.00 dB

F2 - Processing parameters  
 SI 32768  
 SF 160.4615704 MHz  
 MDW CM  
 SSB 0  
 LB -30.00 Hz  
 GB 0.15  
 PC 1.40

ID NMR plot parameters  
 CX 34.00 cm  
 PIP 30.000 ppm  
 PI 4813.85 Hz  
 PIZ -50.000 ppm  
 FZ -8023.08 Hz  
 PPRCM 2.35294 ppm/cm  
 BSCM 377.55661 Hz/cm

160 MHz  $^{11}\text{B}$  (upper trace) and  $^{11}\text{B}\{-^1\text{H}\}$  (lower trace) spectra for the  $[\text{B}_{16}\text{H}_{19}]^-$  anion (species 1a) as its  $[\text{C}_{10}\text{H}_{16}(\text{NMe}_2)_2\text{H}]^+$  salt 1b

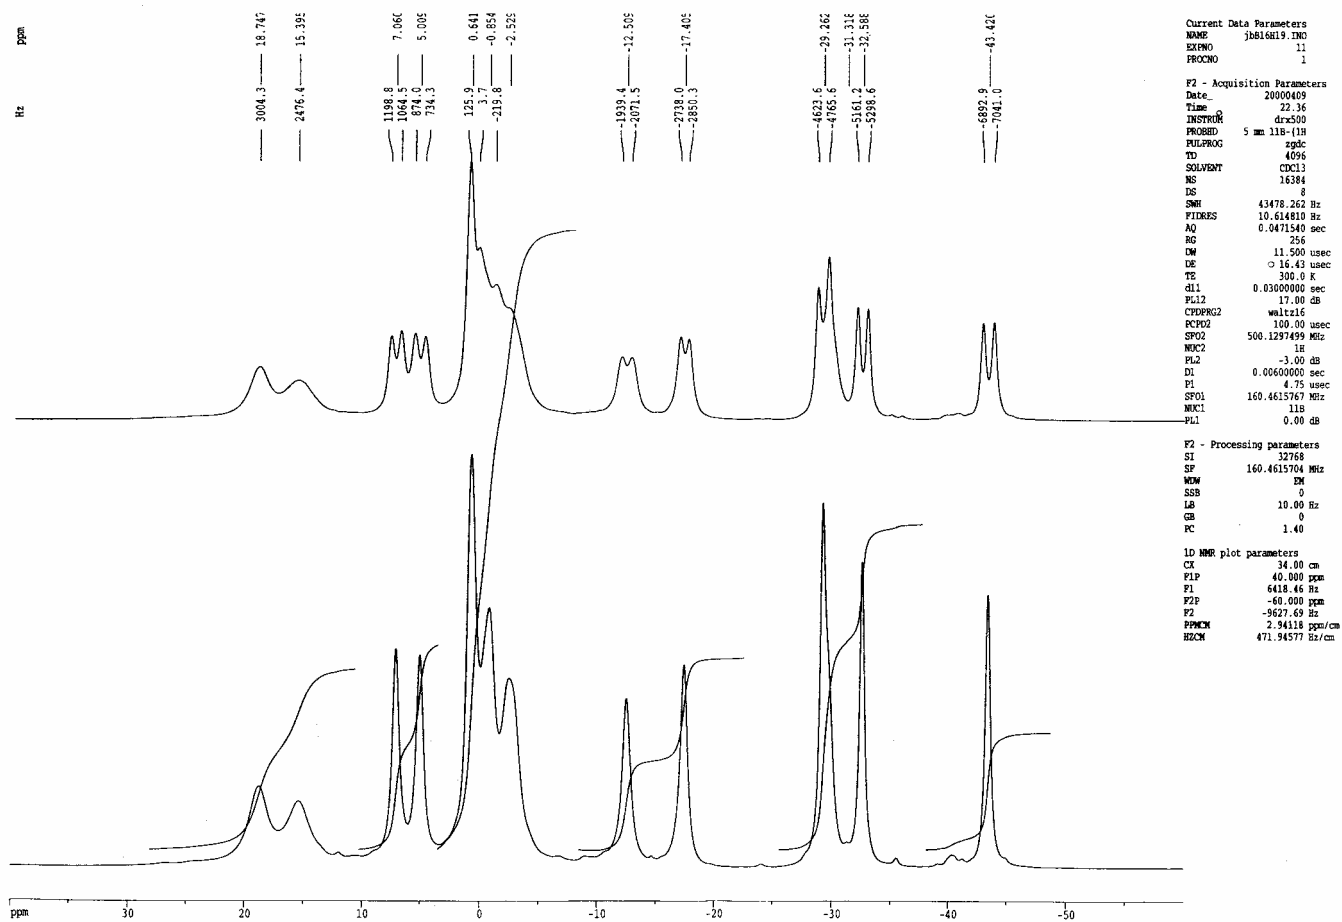

Supplement: b419241a.pdf [file b419241a.pdf]
